# Supplementary material for: Sources of variation in false discovery rate estimation include sample size, correlation, and inherent differences between groups
Source: PubMed Central journal article supplement (PMC3426804; doi:10.1186/1471-2105-13-s13-s1), 2012-08-24

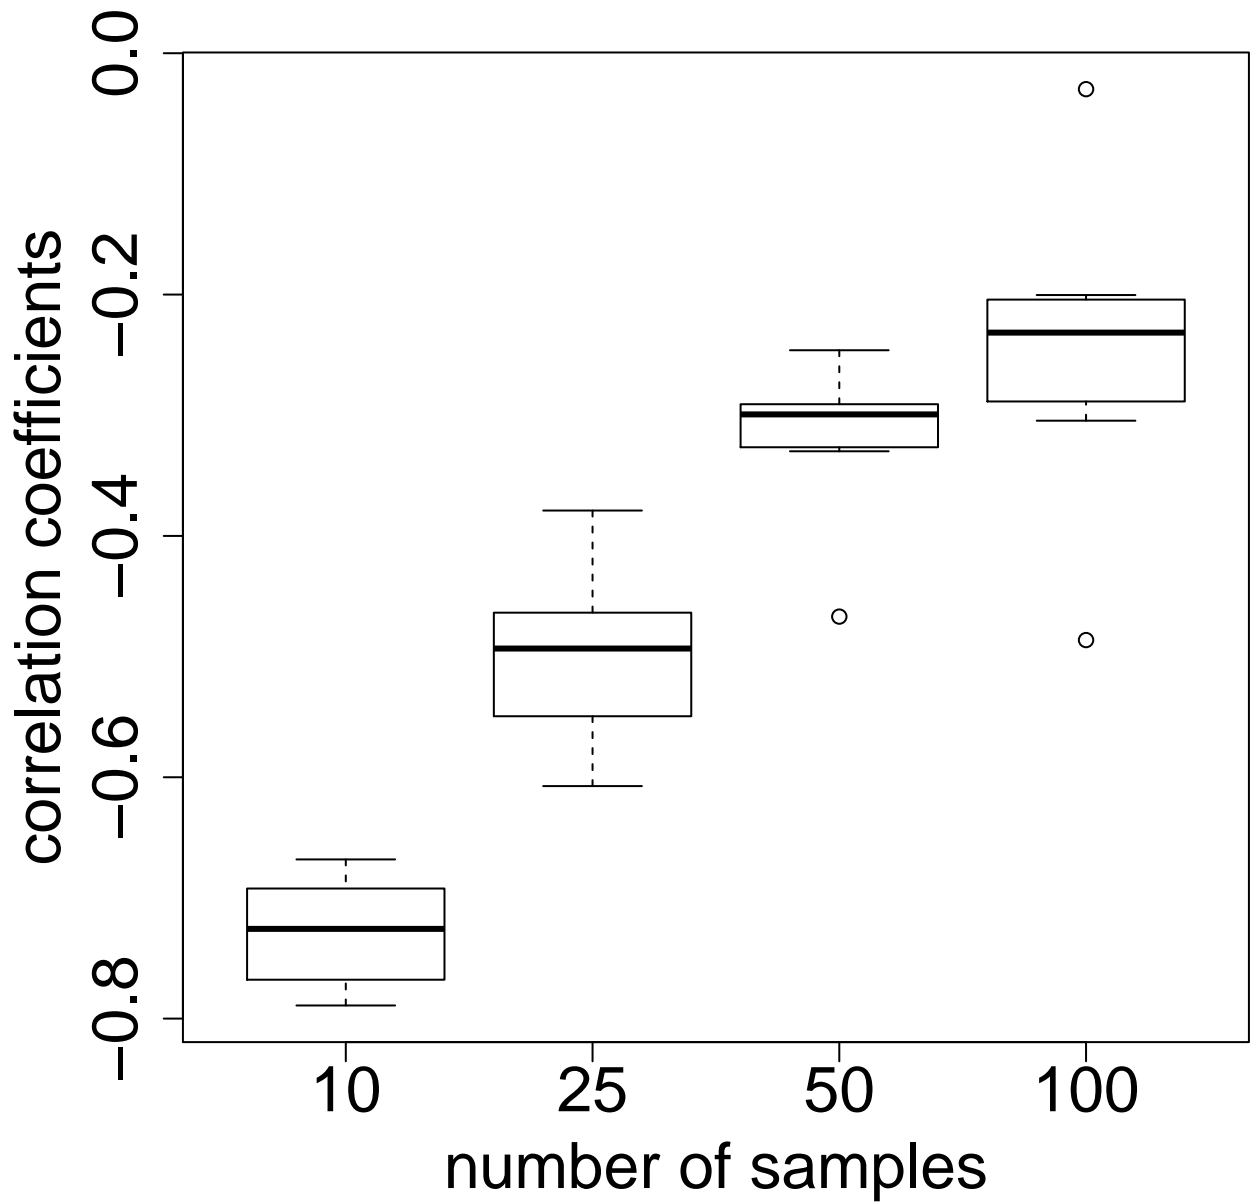

Supplement: 1471-2105-13-S13-S1-S1.pdf [file 1471-2105-13-S13-S1-S1.pdf]
