# Supplementary material for: Sources of variation in false discovery rate estimation include sample size, correlation, and inherent differences between groups
Source: PubMed Central journal article supplement (PMC3426804; doi:10.1186/1471-2105-13-s13-s1), 2012-08-24

corr.std

0.30  
0.20  
0.10

nSamples=10

nSamples=25

nSamples=50

nSamples=100

block size

1 5 10 50 100 250 500 1000

sample size and block size

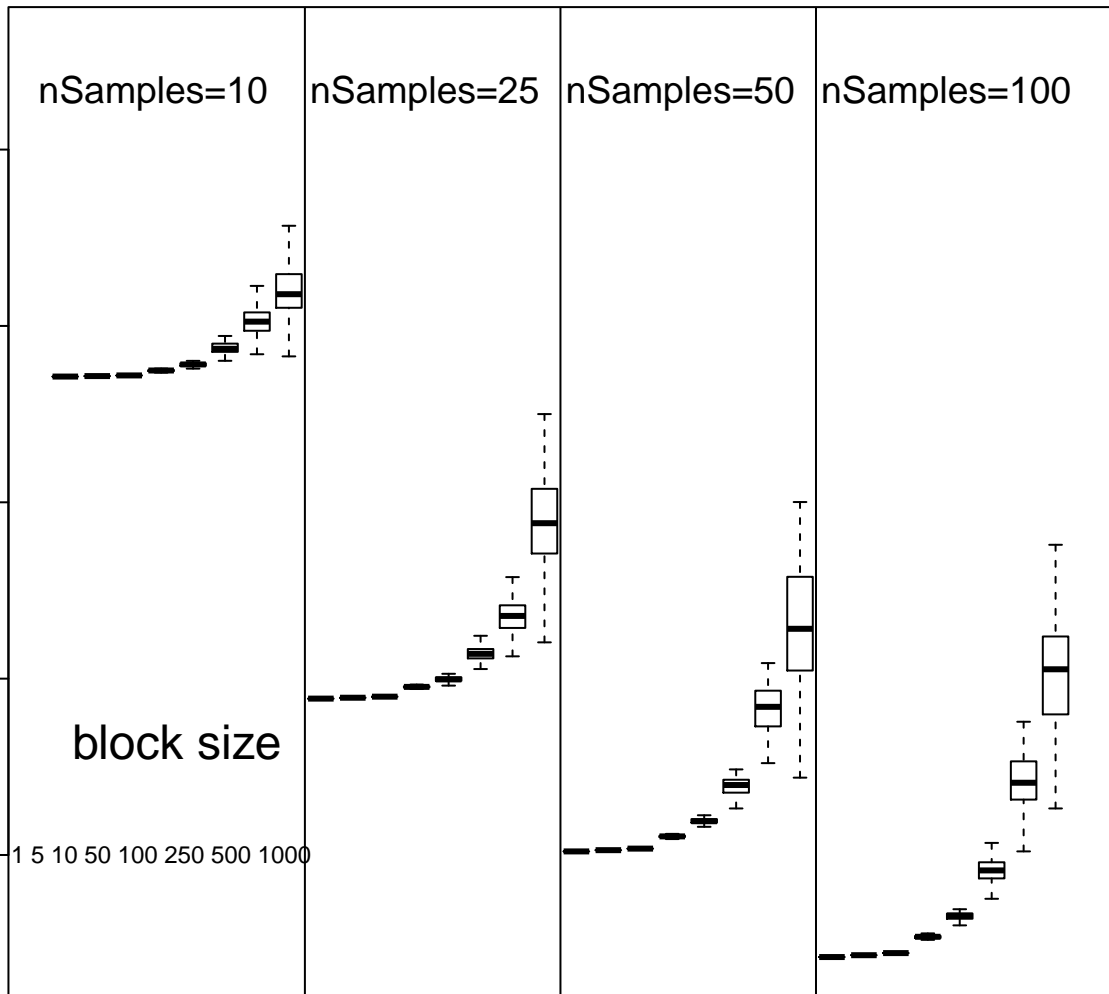

Supplement: 1471-2105-13-S13-S1-S4.pdf [file 1471-2105-13-S13-S1-S4.pdf]
